# Supplementary material for: The Landscape of Regulatory Noncoding RNAs in Ewing’s Sarcoma
Source: MDPI journal article supplement (doi:10.3390/biomedicines9080933), 2021-07-31
Supplement: s1 [file s1]

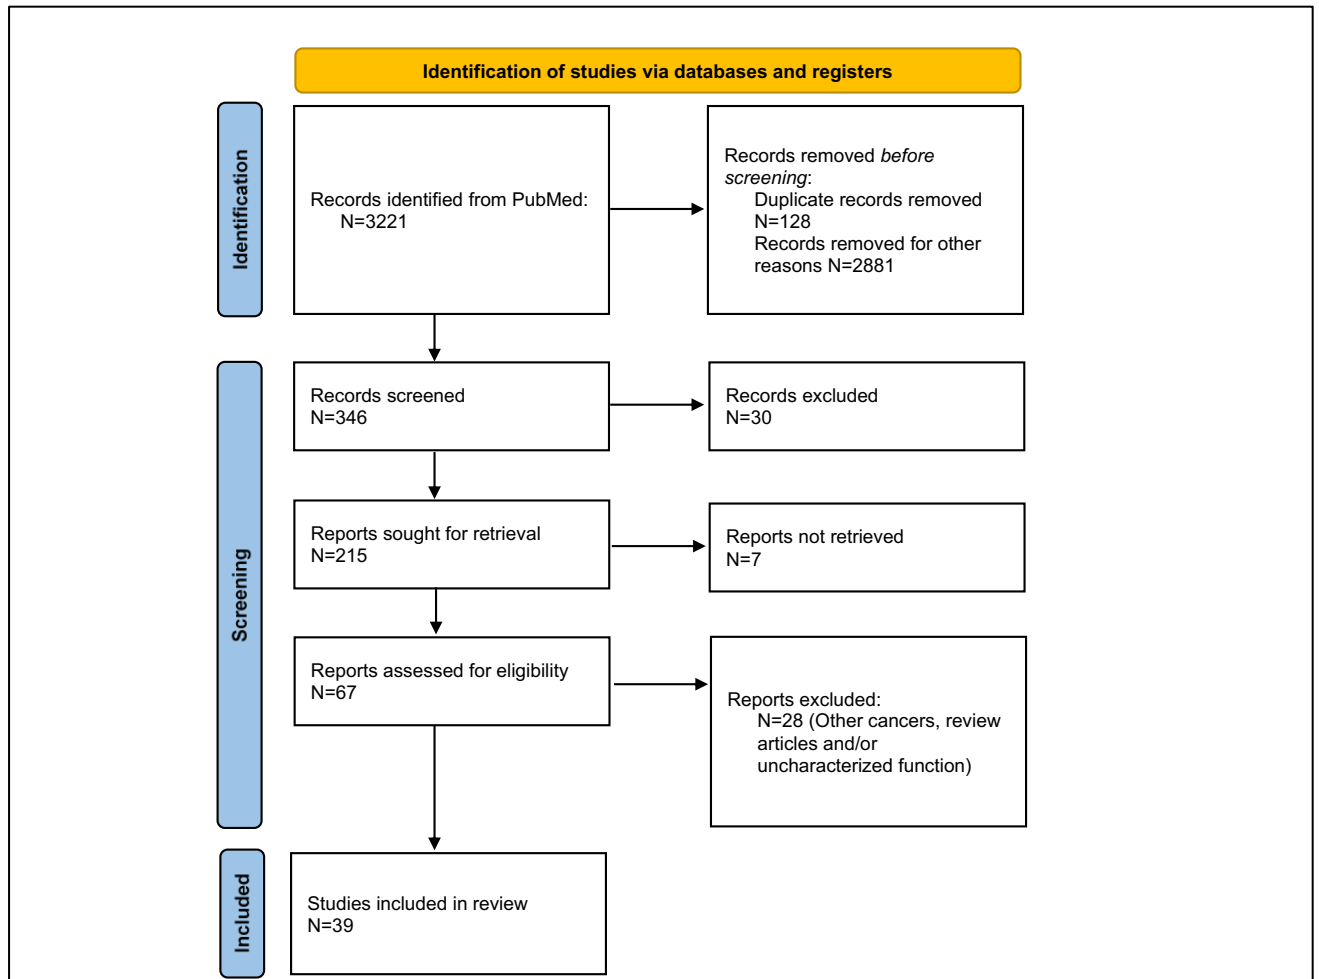

**Figure S1.** Adapted PRISMA 2020 flow diagram for a review including searches (e.g. “Ewing’s sarcoma” + miRNA) of databases only. Numbers do not include articles relevant to background information, ES pathology or hypothetical connections.

**Table S1.** PubMed Keyword Search Totals

| <b>Search Terms (2011-2021 Filter)</b> | <b>Results</b> |
|----------------------------------------|----------------|
| ncRNA AND Ewing's sarcoma              | 124            |
| miRNA AND Ewing's sarcoma              | 84             |
| circRNA AND Ewing's sarcoma            | 1              |
| tRNA fragments AND Ewing's sarcoma     | 2              |
| siRNA AND Ewing's sarcoma              | 79             |
| splicing AND Ewing's sarcoma           | 33             |
| lncRNA AND Ewing's sarcoma             | 17             |
| biomarkers AND Ewing's sarcoma         | 500            |
| diagnosis AND Ewing's sarcoma          | 2381           |
